# Supplementary material for: Exploring Nitrogen-Functionalized Graphene Composites for Urinary Catheter Applications
Source: MDPI journal article supplement (doi:10.3390/nano13182604), 2023-09-21
Supplement: s1 [file s1]

## Supplementary Material

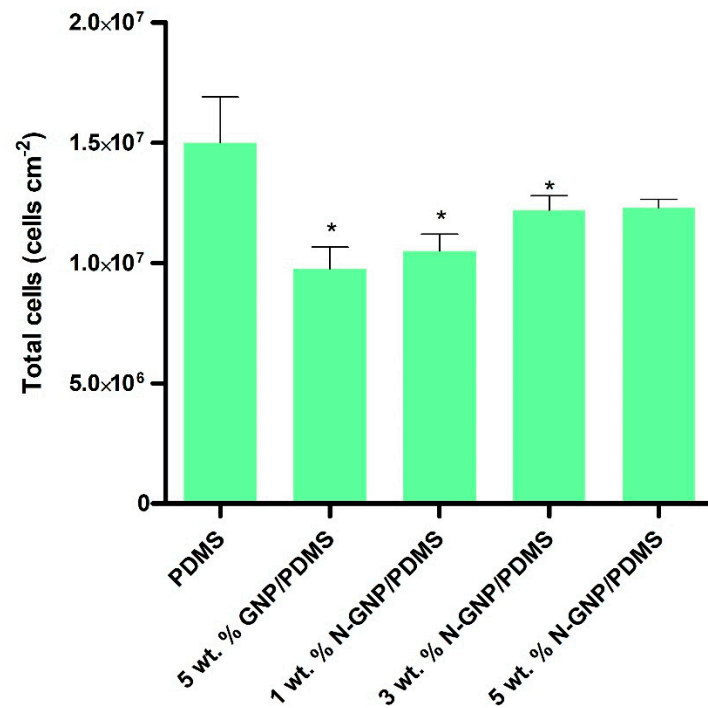

**Figure S1.** Number of total cells of *S. aureus* biofilms formed on PDMS, 5 wt. % GNP/PDMS and 1, 3 and 5 wt. % N-GNP/PDMS surfaces. Results are presented as mean  $\pm$  SD. Significant differences between GNP-based surfaces and the control (PDMS) were considered for  $p$ -values  $< 0.05$  (\*).

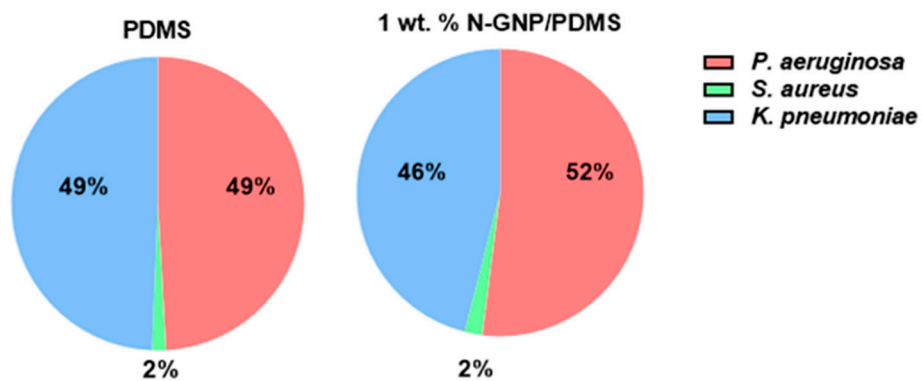

**Figure S2.** Proportion of *P. aeruginosa* (in red), *S. aureus* (in green), and *K. pneumoniae* (in blue) cells in multi-species biofilms formed on PDMS (left) and 1 wt. % N-GNP/PDMS (right) surfaces.

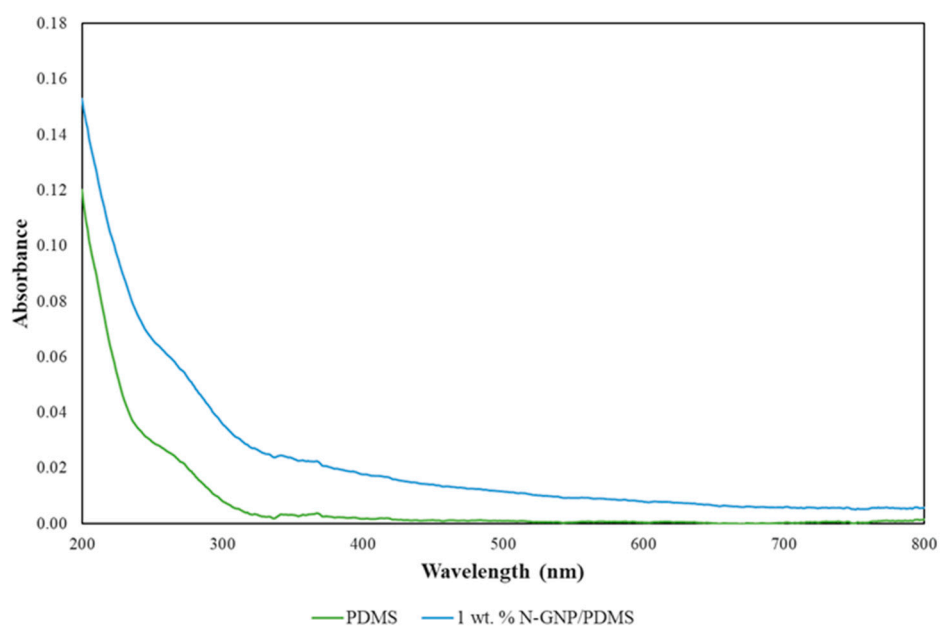

**Figure S3.** UV-Vis spectra of AUM medium after contact with PDMS (green line) and 1 wt. % N-GNP/PDMS (blue line) surfaces.
